# Supplementary material for: Clinical Correlates of Prescription Opioid Analgesic Use in Pregnancy
Source: Springer Nature journal article supplement (doi:10.1007/s10995-014-1536-6), 2014-06-20
Supplement: MOESM1 [file 10995_2014_1536_MOESM1_ESM.docx]

| **Table XX: List of General Medical Conditions Potentially Treatable with Opioids** |
| --- |
| Secondary syphilis of skin and mucous membranes |
| Anogenital herpesviral infection, unspecified |
| Herpesviral vesicular dermatitis |
| Herpesviral gingivostomatitis and pharyngotonsillitis |
| Herpesviral infection, unspecified |
| Gammaherpesviral mononucleosis |
| Malignant melanoma of skin, unspecified |
| Malignant neoplasm of ovary |
| Leukaemia, unspecified |
| Neoplasm of uncertain behavior of other female genital organs |
| Neoplasm of uncertain behavior of spinal cord |
| Beta thalassemia |
| Immune thrombocytopenic purpura |
| Disease of blood and blood-forming organs, unspecified |
| Multiple sclerosis |
| Migraine, unspecified |
| Cluster headache syndrome |
| Trigeminal neuralgia |
| Carpal tunnel syndrome |
| Pulmonary embolism without mention of acute cor pulmonale |
| Acute sinusitis, unspecified |
| Chronic frontal sinusitis |
| Chronic sinusitis, unspecified |
| Crohn's disease, unspecified |
| Ulcerative colitis, unspecified |
| Calculus of gallbladder without cholecystitis |
| Calculus of bile duct without cholangitis or cholecystitis |
| Disease of gallbladder, unspecified |
| Disease of pancreas, unspecified |
| Celiac disease |
| Discoid lupus erythematosus |
| Other specified localized connective tissue disorders |
| Localized connective tissue disorder, unspecified |
| Vasculitis limited to the skin, unspecified |
| Rheumatoid arthritis |
| Juvenile rheumatoid arthritis |
| Arthritis, unspecified |
| Polyosteoarthritis, unspecified |
| Systemic lupus erythematosus, unspecified |
| Scoliosis, unspecified |
| Other specified intervertebral disc degeneration |
| Other specified intervertebral disc disorders |
| Unspecified thoracic, thoracolumbar and lumbosacral intervertebral disc disorder |
| Low back pain |
| Dorsalgia, unspecified |
| Rheumatism, unspecified |
| Fibromyalgia |
| Calculus of kidney |
| Urethral fistula |
| Endometriosis, unspecified |
| Other and unspecified ovarian cysts |
| Spina bifida, unspecified |
| sickle cell anemia |
| Other chronic pain |
| Pain, unspecified |
| Intracranial injury, unspecified |

pancreatitis
